# Supplementary material for: Understanding the effect of depressing surface moisture sensitivity on promoting sodium intercalation in coral-like Na3.12Fe2.44(P2O7)2/C synthesized via a flash-combustion strategy
Source: Royal Society of Chemistry journal article supplement (doi:10.1039/c5ta09403h), 2016-01-01
Supplement: c5ta09403h1.pdf [file c5ta09403h1.pdf]

## Supporting information

### Table of contents

**Figure S1** SEM (a, b, d, e) and TEM (c, f) images of the low-carbon (a~c) and carbon-coated (d~f) reference samples. Both samples have microscale particles with the size of 8~10  $\mu\text{m}$ . The low-carbon reference sample has smooth surface, but the carbon-coated reference sample has coarse surface, indicating their different surface properties.

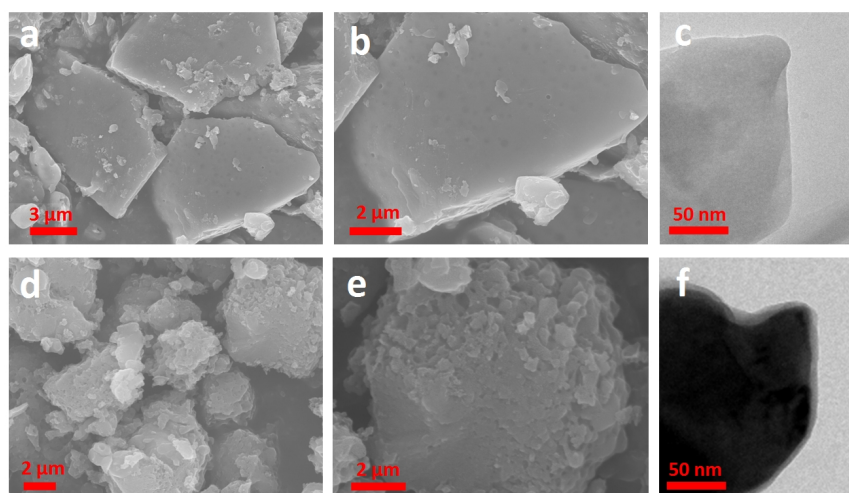

**Figure S2** Comparison of the surface area (a) and carbon content (b) of the coral-like (1), low-carbon reference (2) and carbon-coated reference (3) samples. The carbon-coated reference sample and the coral-like sample have similar carbon content, and the low-carbon reference sample exhibits extreme low carbon content.

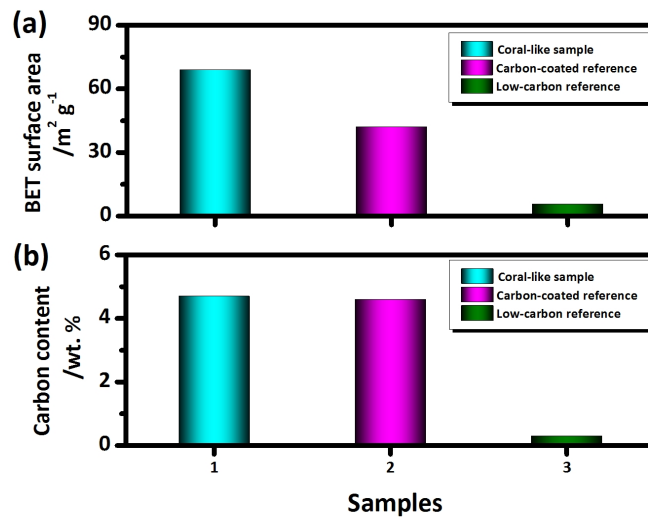

## Section II. Supporting Tables

Table S1 Lattice parameters of the coral-like, low-carbon reference and carbon-coated reference samples.

| Materials               | $a/\text{\AA}$ | $b/\text{\AA}$ | $c/\text{\AA}$ | $\alpha/^\circ$ | $\beta/^\circ$ | $\gamma/^\circ$ |
|-------------------------|----------------|----------------|----------------|-----------------|----------------|-----------------|
| Coral-like sample       | 6.4167(4)      | 9.4126(5)      | 11.0000(5)     | 64.3766(1)      | 85.7942(5)     | 73.0810(0)      |
| Carbon-coated reference | 6.4148(4)      | 9.4321(6)      | 11.0199(7)     | 64.2732(5)      | 85.6715(3)     | 73.2013(1)      |
| Low-carbon reference    | 6.4106(6)      | 9.4346(6)      | 11.0185(8)     | 64.2746(1)      | 85.6184(8)     | 73.1924(8)      |

Table S2 Atomic ratios of the coral-like, low-carbon reference and carbon-coated reference samples.

| Atomic ratio   | Coral-like sample | Carbon-coated reference | Low-carbon reference |
|----------------|-------------------|-------------------------|----------------------|
| $Na:Fe$        | 1.2791            | 1.2802                  | 1.2898               |
| Designed value | 1.2787            | 1.2787                  | 1.2787               |
